# Supplementary material
Source: publisher figshare collection journal article supplement (https://acs.figshare.com/ndownloader/files/4737040)
Supplement: Supplementary file 1 [file 4737040]

# **Bisoxazoline-Lewis Acid Catalyzed Direct-Electron Demand *oxo*-Hetero-Diels-Alder Reactions of Pyridine-*N*-Oxide Aldehyde and Ketone Derivatives**

*Aitor Landa,<sup>†</sup> Bo Richter,<sup>†</sup> Rasmus Lyng Johansen,<sup>†</sup> Anna Minkkilä<sup>†,‡</sup> and Karl Anker  
Jørgensen<sup>\*†</sup>*

E-mail: [kaj@chem.au.dk](mailto:kaj@chem.au.dk)

<sup>†</sup> The Danish National Research Foundation: Center for Catalysis, Department of Chemistry, Aarhus University, DK-8000 Aarhus C, Denmark.

<sup>‡</sup> Department of Pharmaceutical Chemistry, University of Kuopio, P.O.Box 1627, FI-70211 Kuopio, Finland

## **Supporting Information**

### **Contents**

|                                                                    |      |
|--------------------------------------------------------------------|------|
| General and Materials.....                                         | S2   |
| X-ray Crystallographic Structure and X-ray Data of <b>5a</b> ..... | S2-3 |
| Analytical and Spectroscopic Data.....                             | S4   |

**General.** The  $^1\text{H}$  and  $^{13}\text{C}$  NMR spectra were recorded at 400 MHz and 100 MHz, respectively. The chemical shifts are reported in ppm relative to MeOH ( $\delta = 3.34$ ) for  $^1\text{H}$  NMR and relative to the central MeOH resonance ( $\delta = 50.41$ ) for  $^{13}\text{C}$  NMR. Purification of reaction products was carried out by flash chromatography (FC) using silica gel 60 (230-400 mesh). The enantiomeric excess (ee) was determined by HPLC. Optical rotation was measured on a polarimeter (Hg lamp 578, solvent MeOH). Mass spectra were recorded using electrospray ( $\text{ES}^+$ ) ionisation techniques.

**Materials:** Bisoxazoline ligands and *N*-oxy-pyridine derivatives were prepared by the literature procedures.<sup>1</sup> Commercially available starting materials were used without further purification. Solvents were distilled prior to use:  $\text{CH}_2\text{Cl}_2$  was dried and distilled from  $\text{CaH}_2$  and THF, THF and toluene were distilled from sodium metal/benzophenone ketyl. All reactions were carried out in an inert atmosphere of Ar and in oven dried glassware.

**Figure.** X-ray Crystallographic Structure of **5a**.

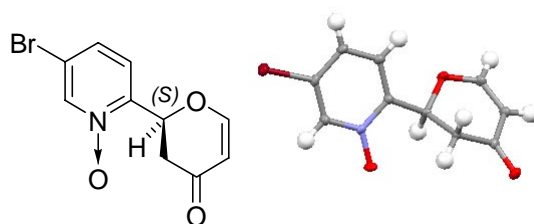

**X-Ray Data Compound 5a:**

---

|                                            |                                                  |
|--------------------------------------------|--------------------------------------------------|
| Formula                                    | C <sub>10</sub> H <sub>8</sub> BrNO <sub>3</sub> |
| Weight, g mol <sup>-1</sup>                | 270.08                                           |
| Crystal system                             | monoclinic                                       |
| Space Group                                | P 1 2 <sub>1</sub> 1                             |
| Z                                          | 4                                                |
| a, Å                                       | 7.1454(10)                                       |
| b, Å                                       | 6.9176(10)                                       |
| c, Å                                       | 10.0029(2)                                       |
| α, °                                       | 90                                               |
| β, °                                       | 98.29                                            |
| γ, °                                       | 90                                               |
| V, Å <sup>3</sup>                          | 489.265(14)                                      |
| T, K                                       | 100                                              |
| ρ, g cm <sup>-3</sup>                      | 1.833                                            |
| μ, mm <sup>-1</sup>                        | 4.185                                            |
| d <sub>min</sub> , Å                       | 0.65                                             |
| N <sub>meas</sub> , N <sub>uniq</sub>      | 10810, 3692                                      |
| R <sub>int</sub>                           | 0.0297                                           |
| N <sub>obs</sub> , N <sub>var</sub>        | 3692, 136                                        |
| R <sub>w</sub> (F <sup>2</sup> ), all data | 0.04994                                          |
| Goodness of fit                            | 1.054                                            |

---

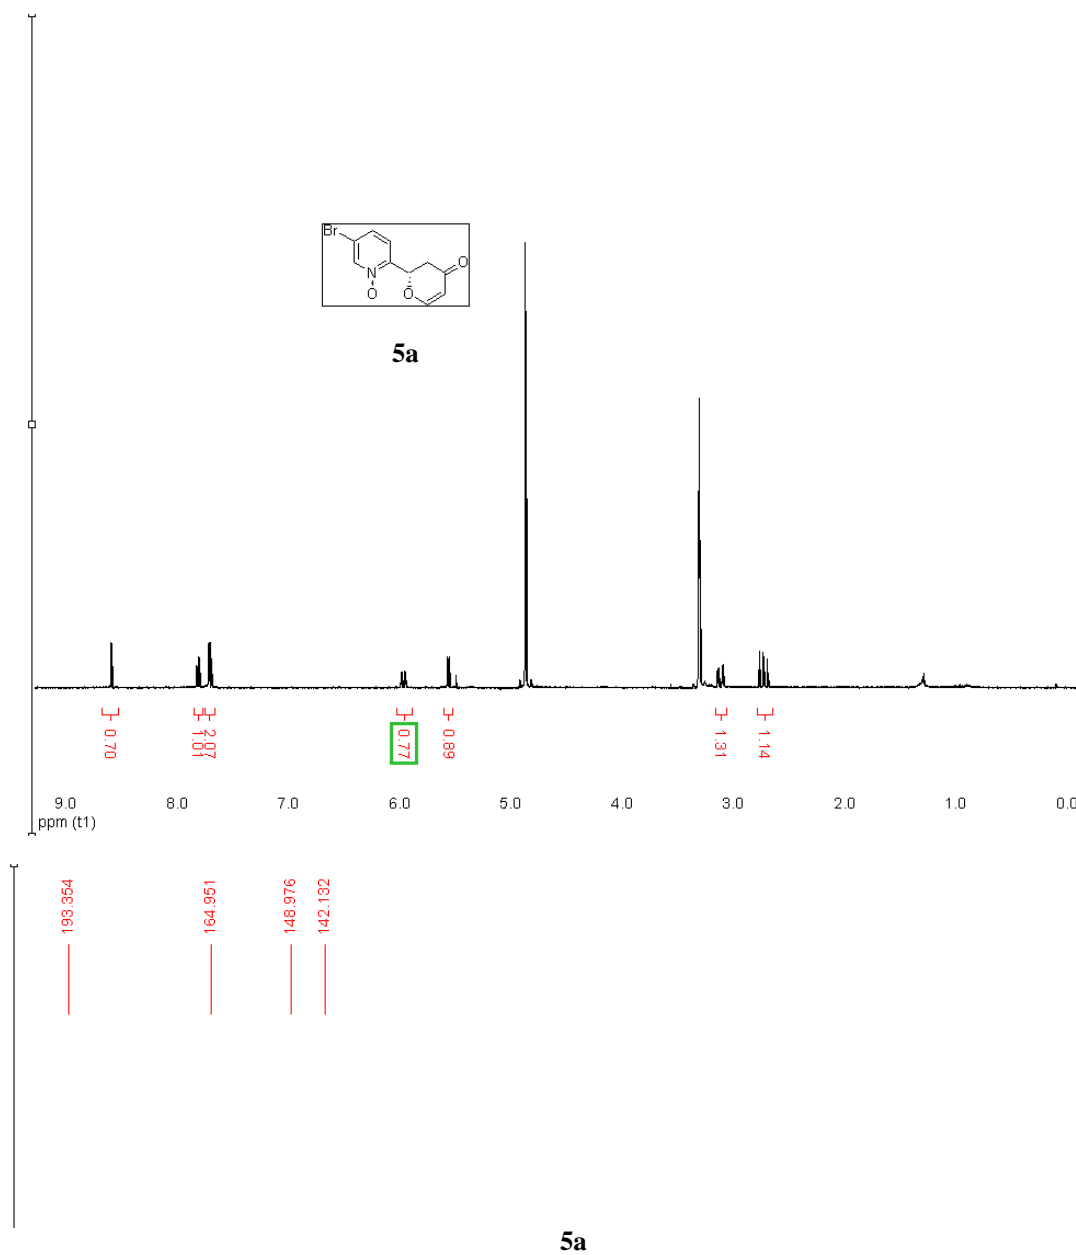

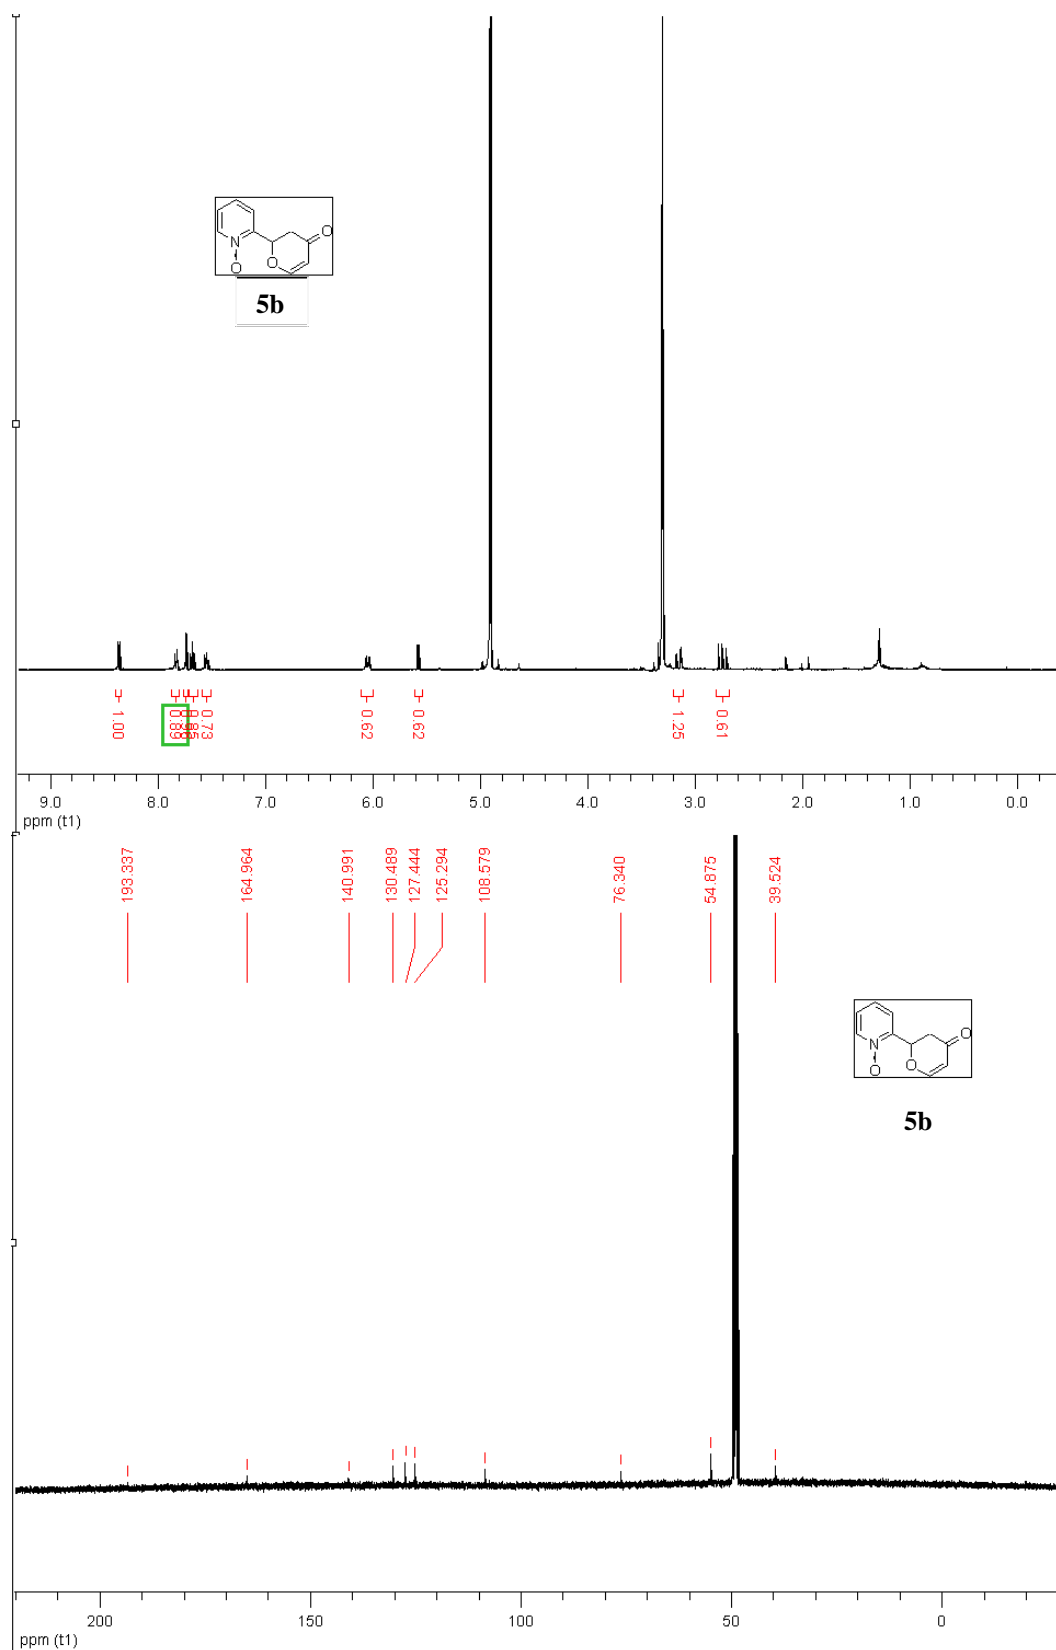

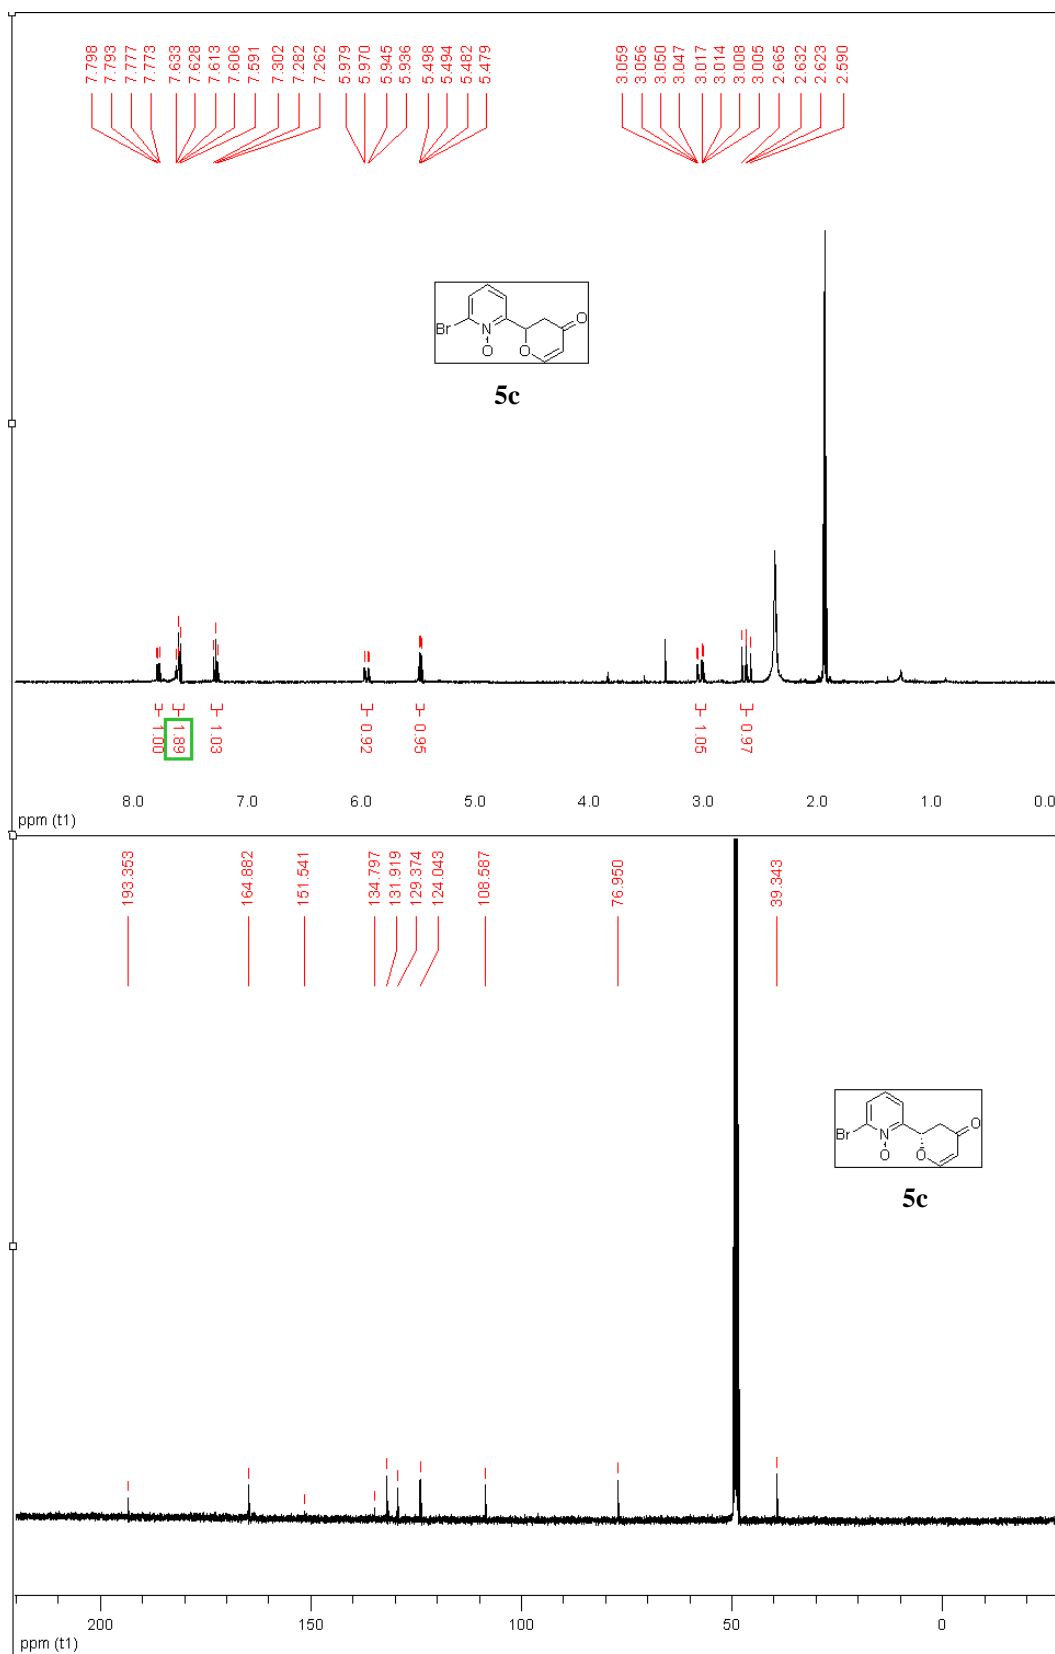

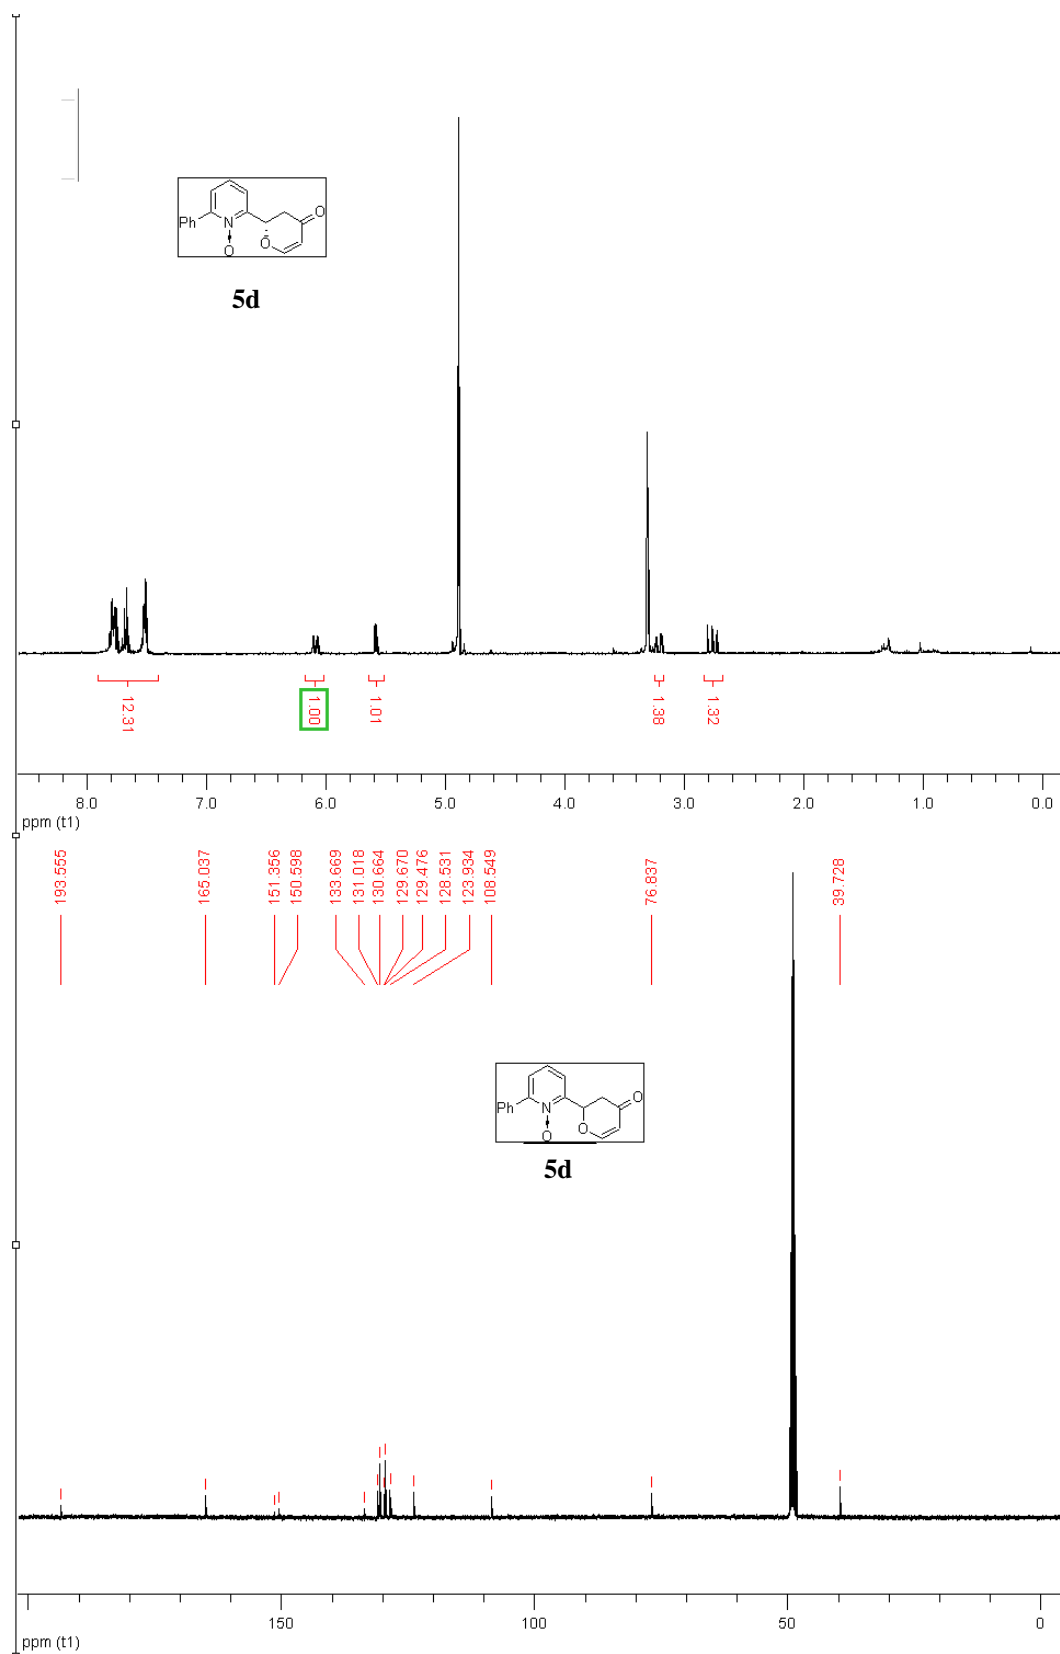

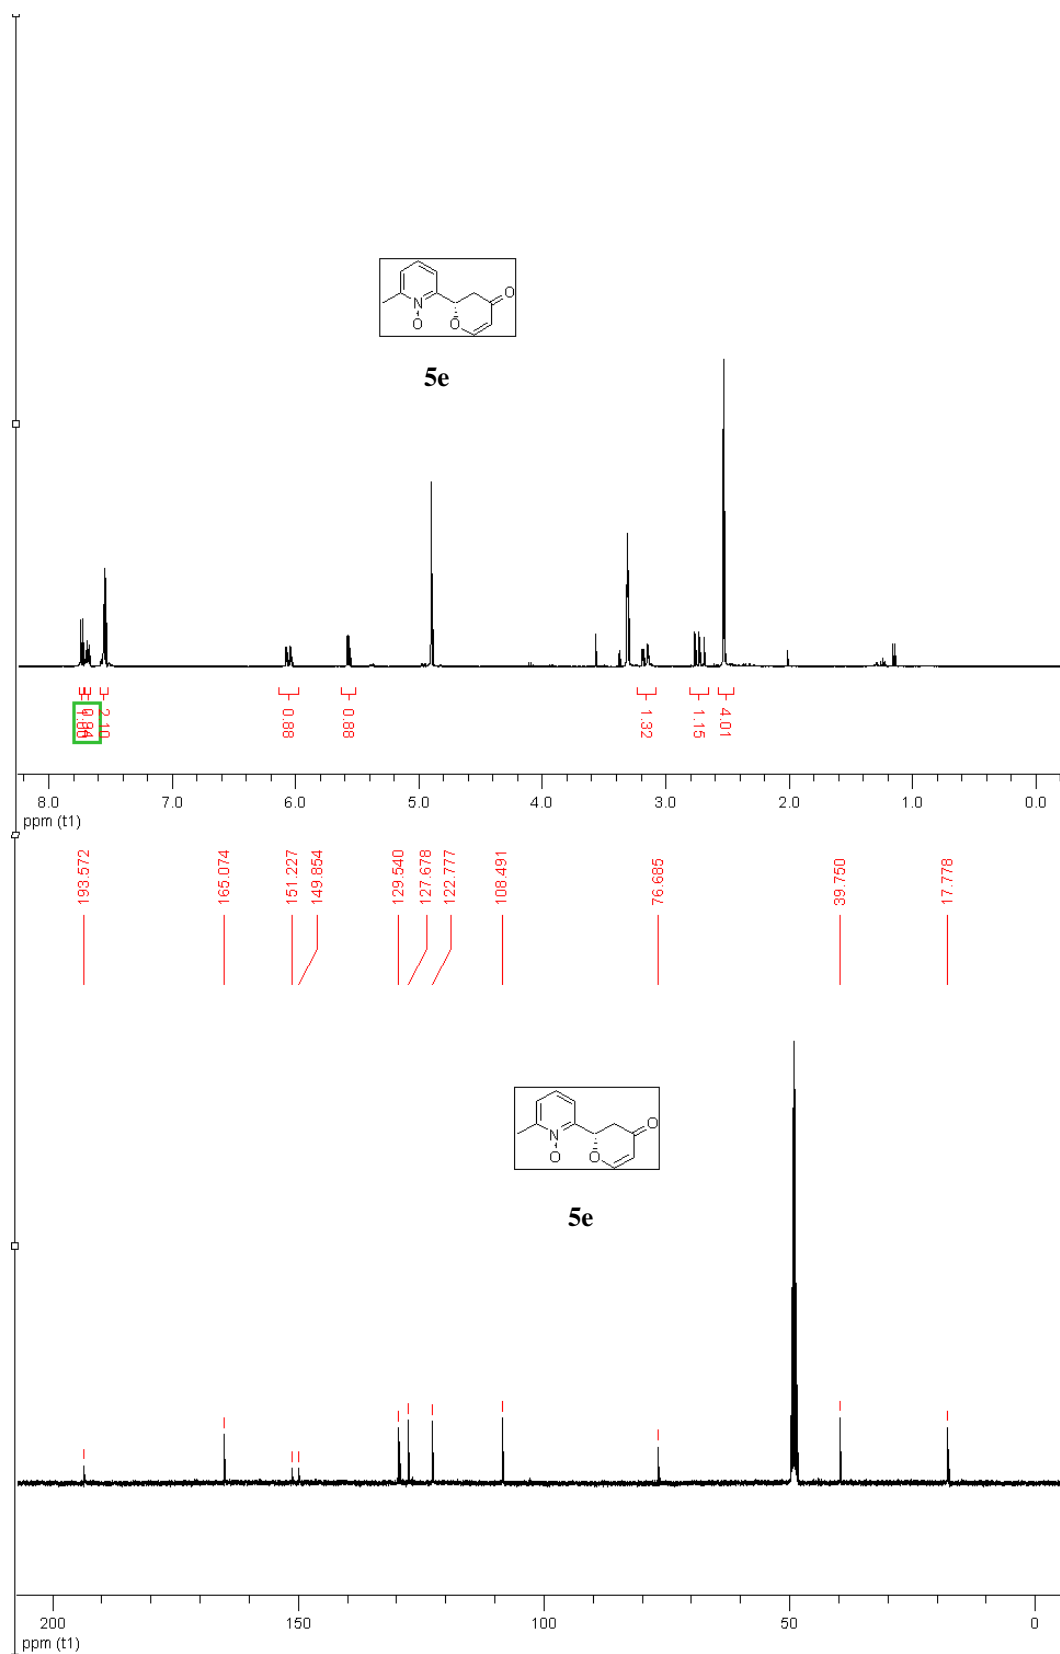



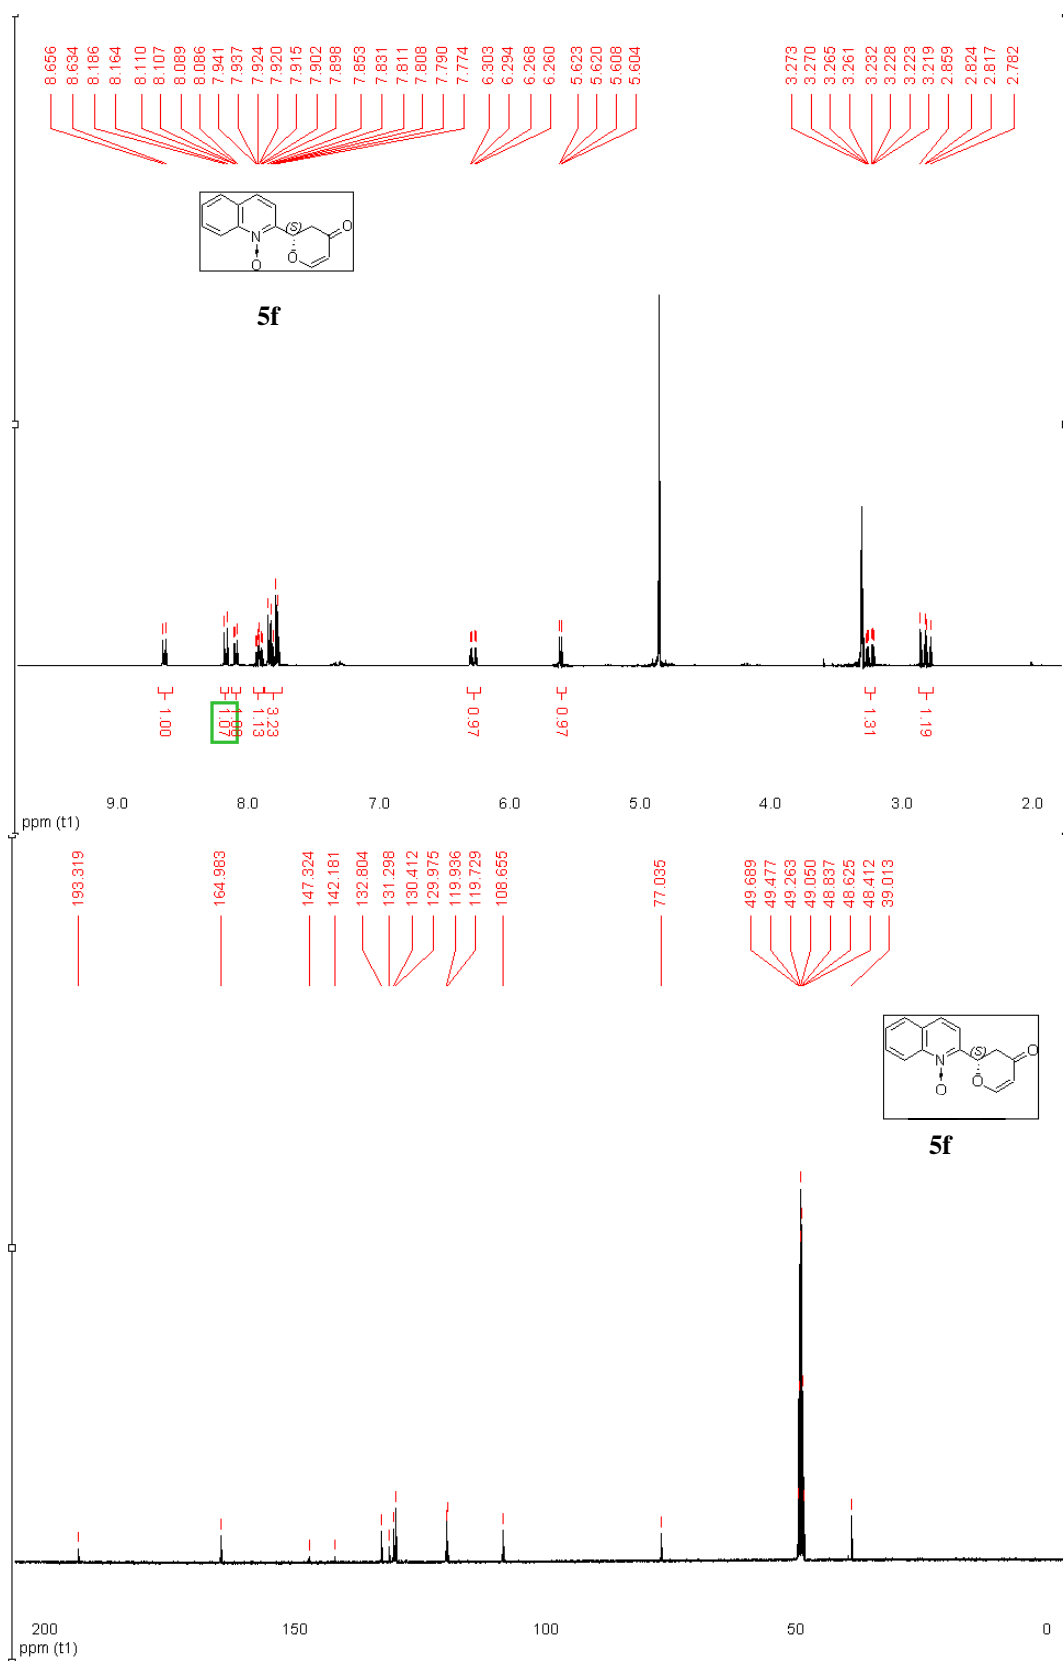

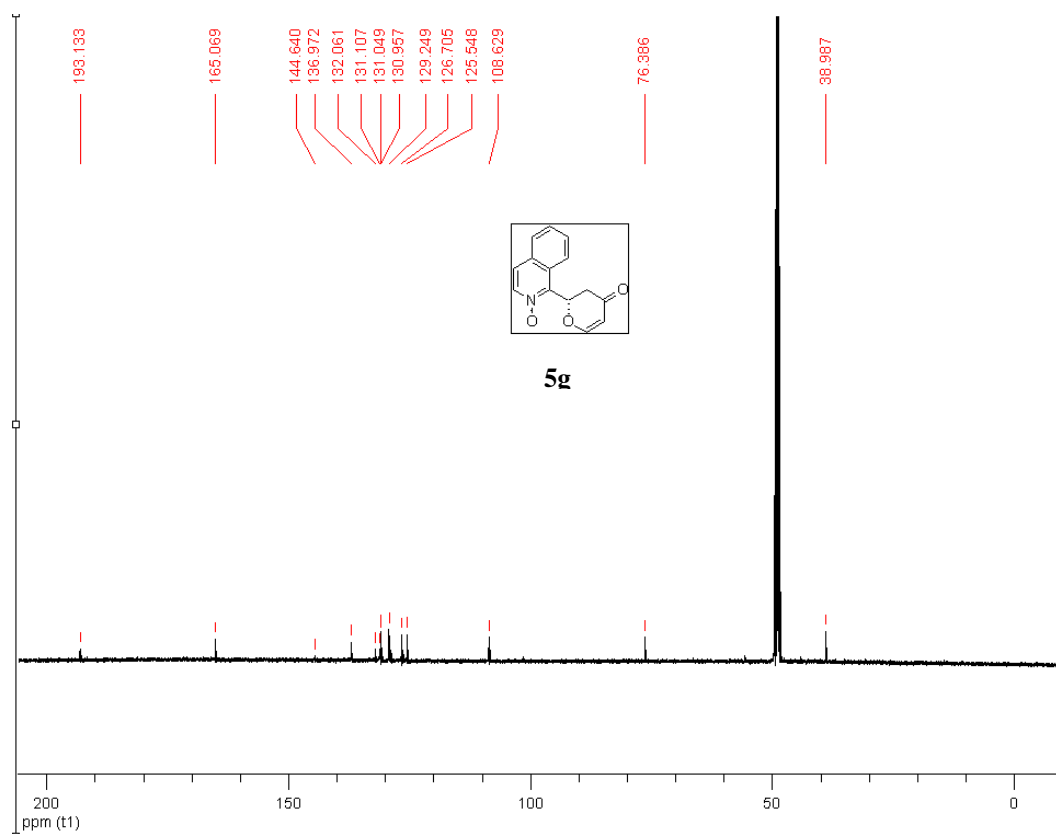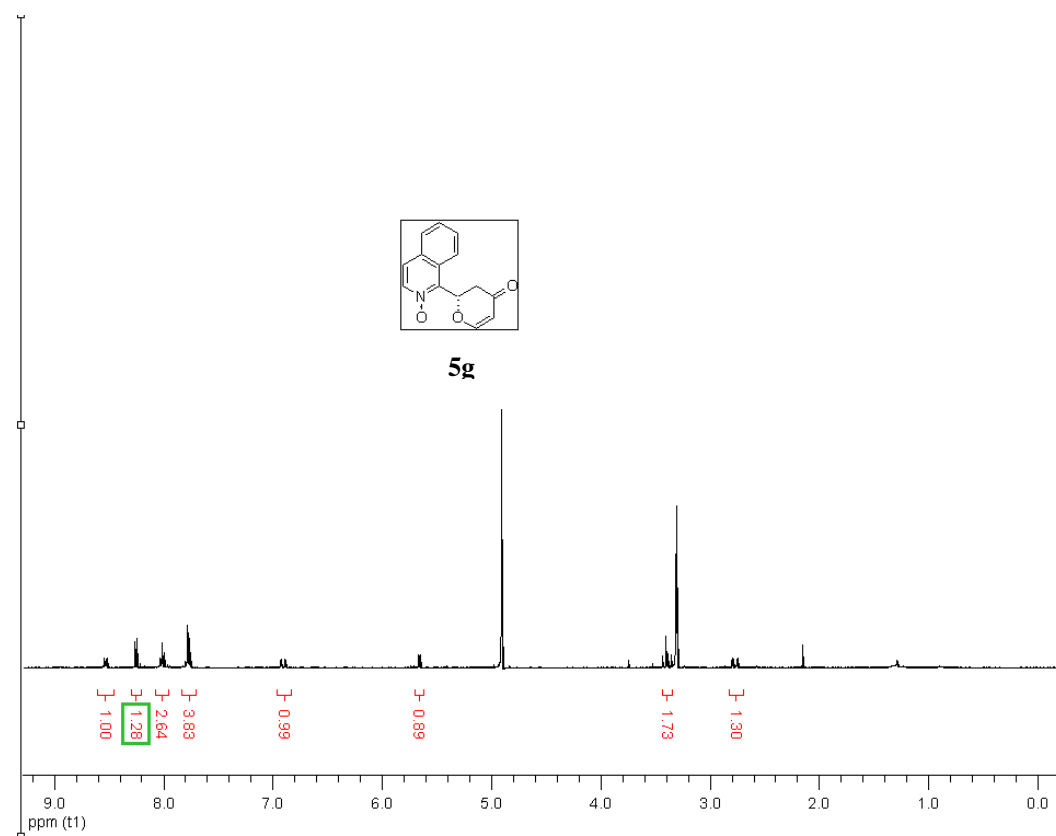

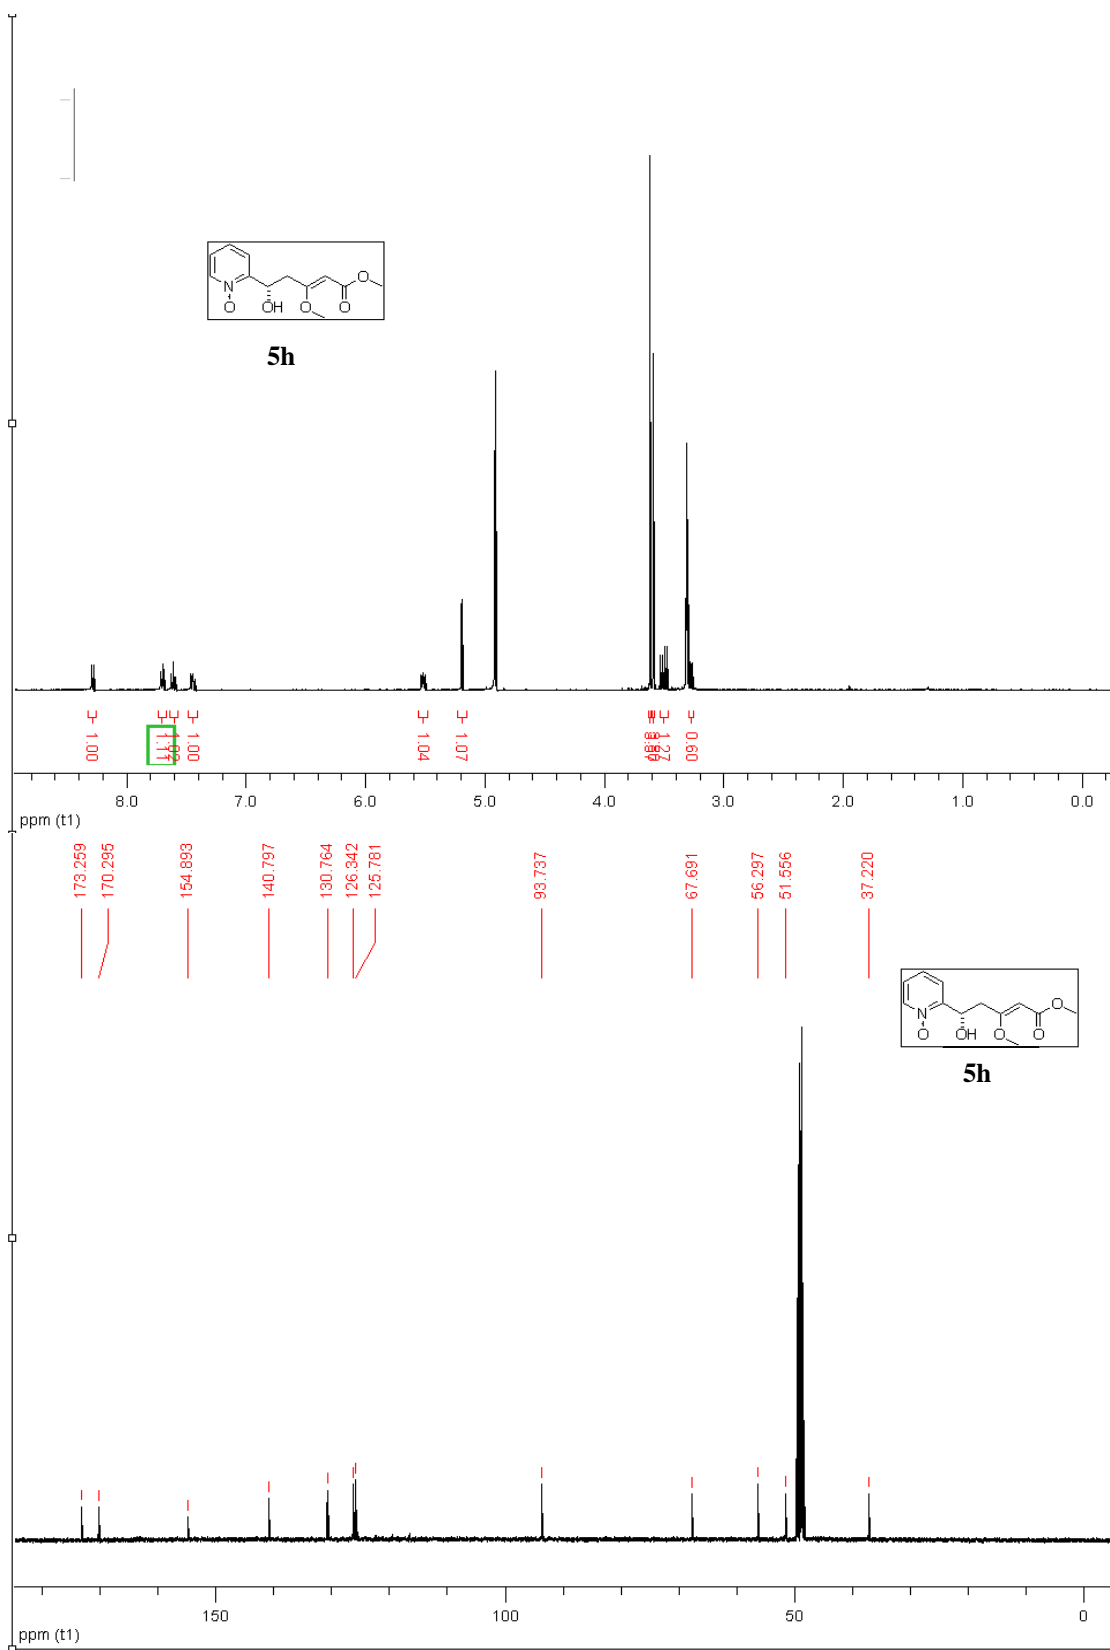

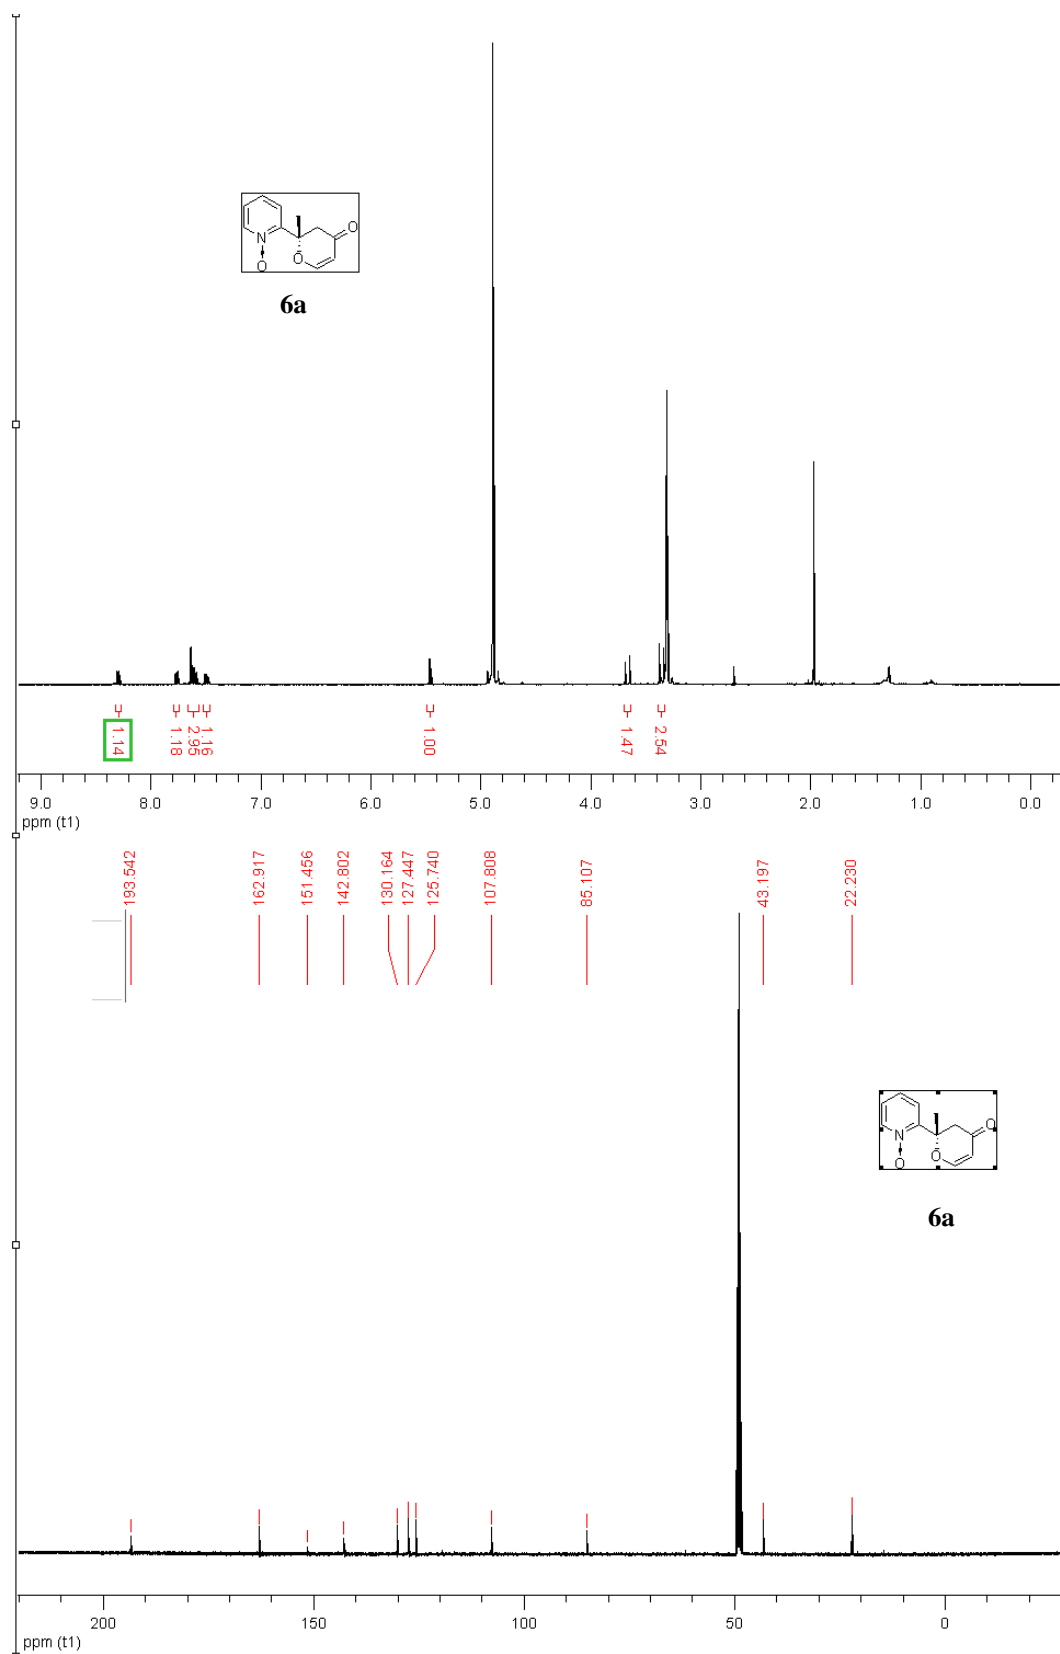

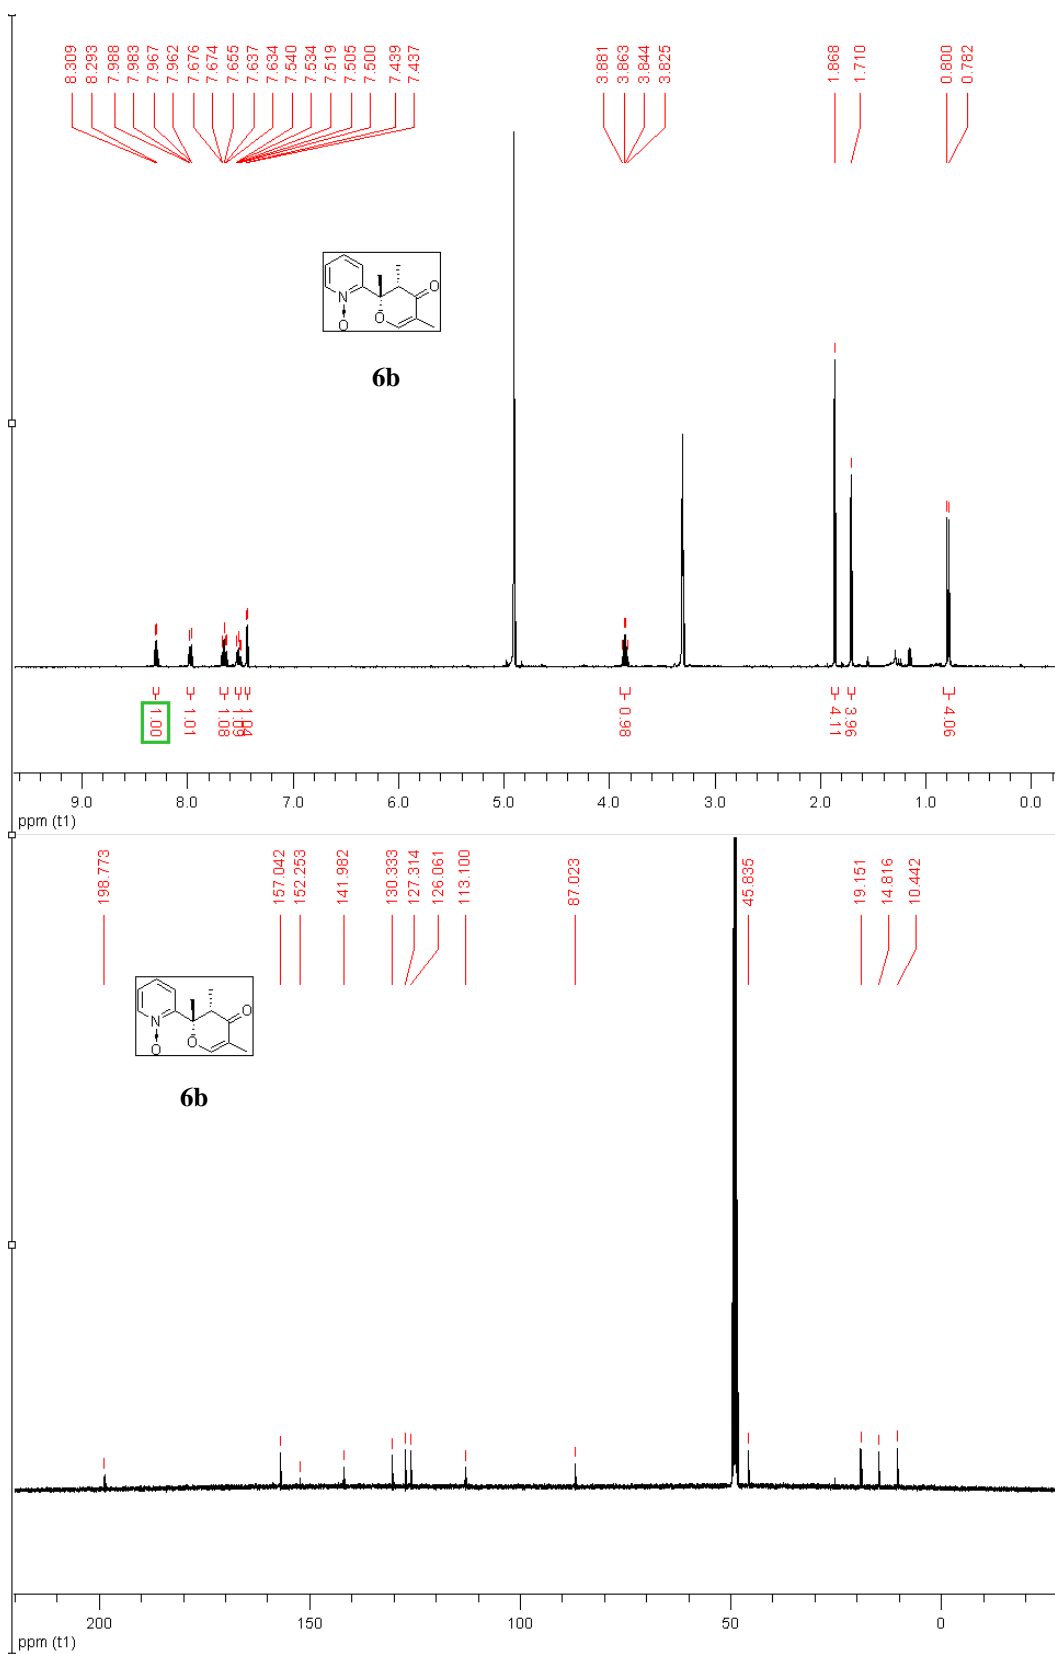

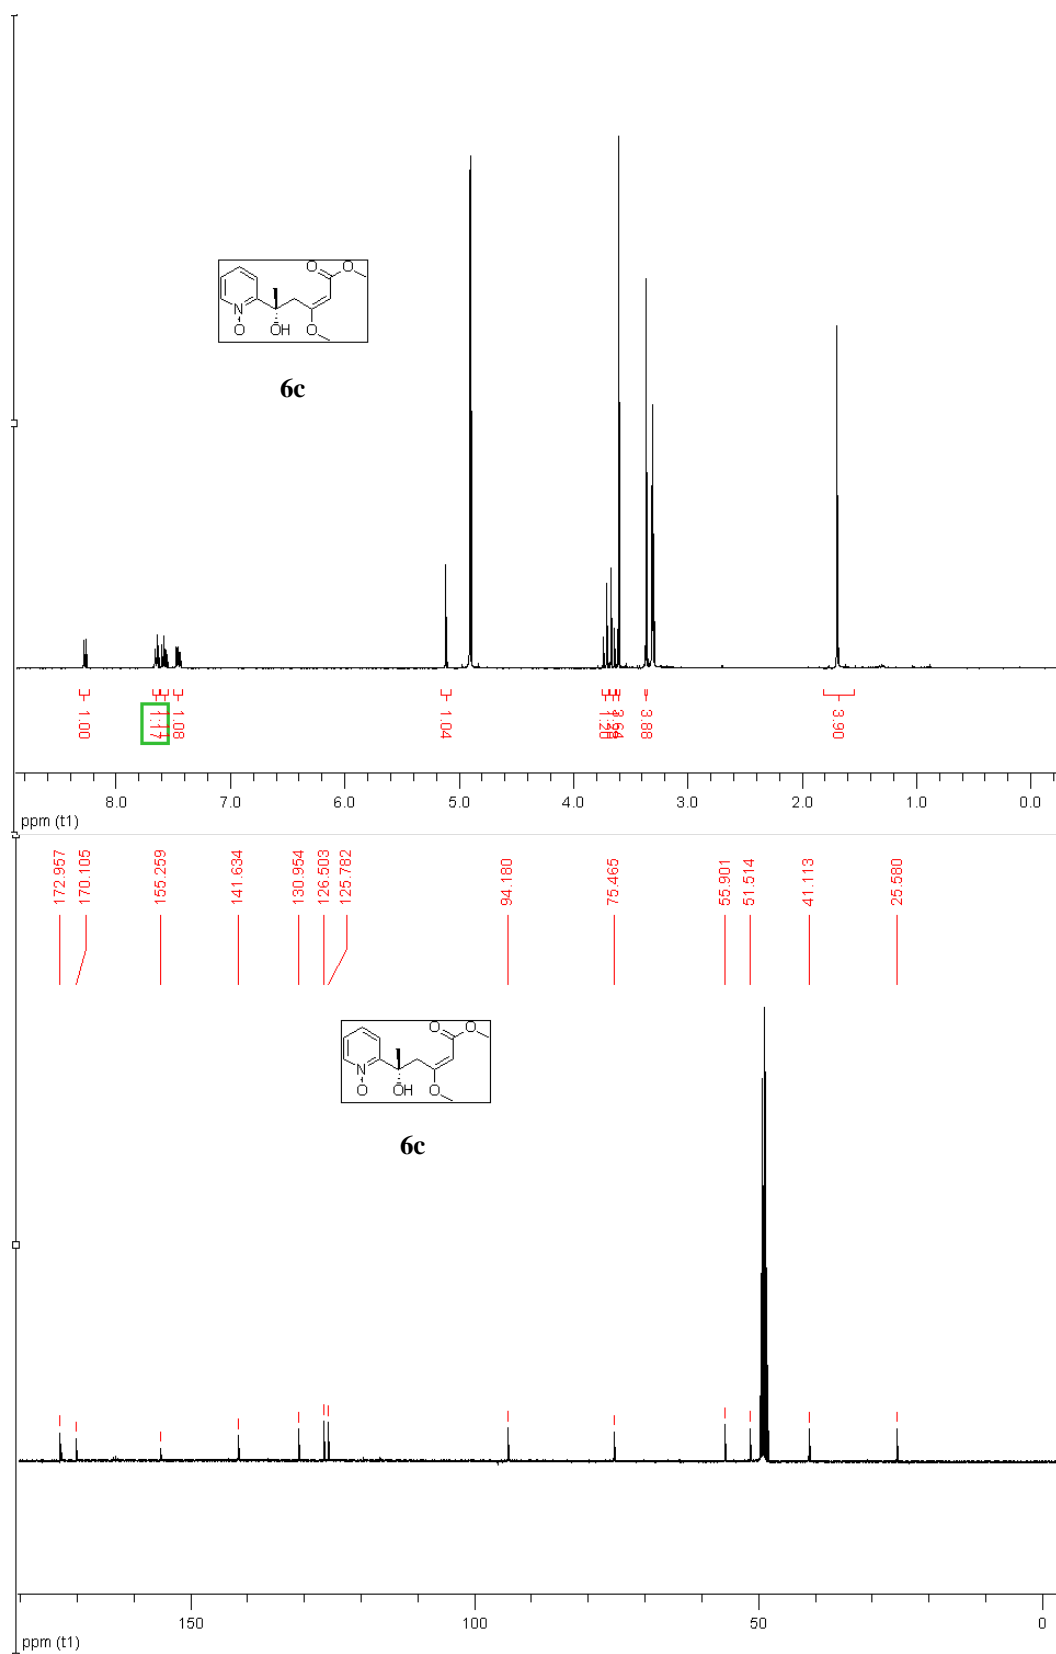

## References

1. Landa, A.; Minkkilä, A.; Blay, G.; Jørgensen, K. A. *Chem. Eur. J.* **2006**, *12*, 3472.
